# Supplementary material for: Characteristic Changes in Decidual Gene Expression Signature in Spontaneous Term Parturition
Source: PubMed Central journal article supplement — J Pathol Transl Med. 2017 Feb 22;51(3):264–83. doi: 10.4132/jptm.2016.12.20 (PMC5445200; doi:10.4132/jptm.2016.12.20), 2017-02-22
Supplement: jptm-2016-12-20-suppl-2.pdf [file jptm-2016-12-20-suppl-2.pdf]

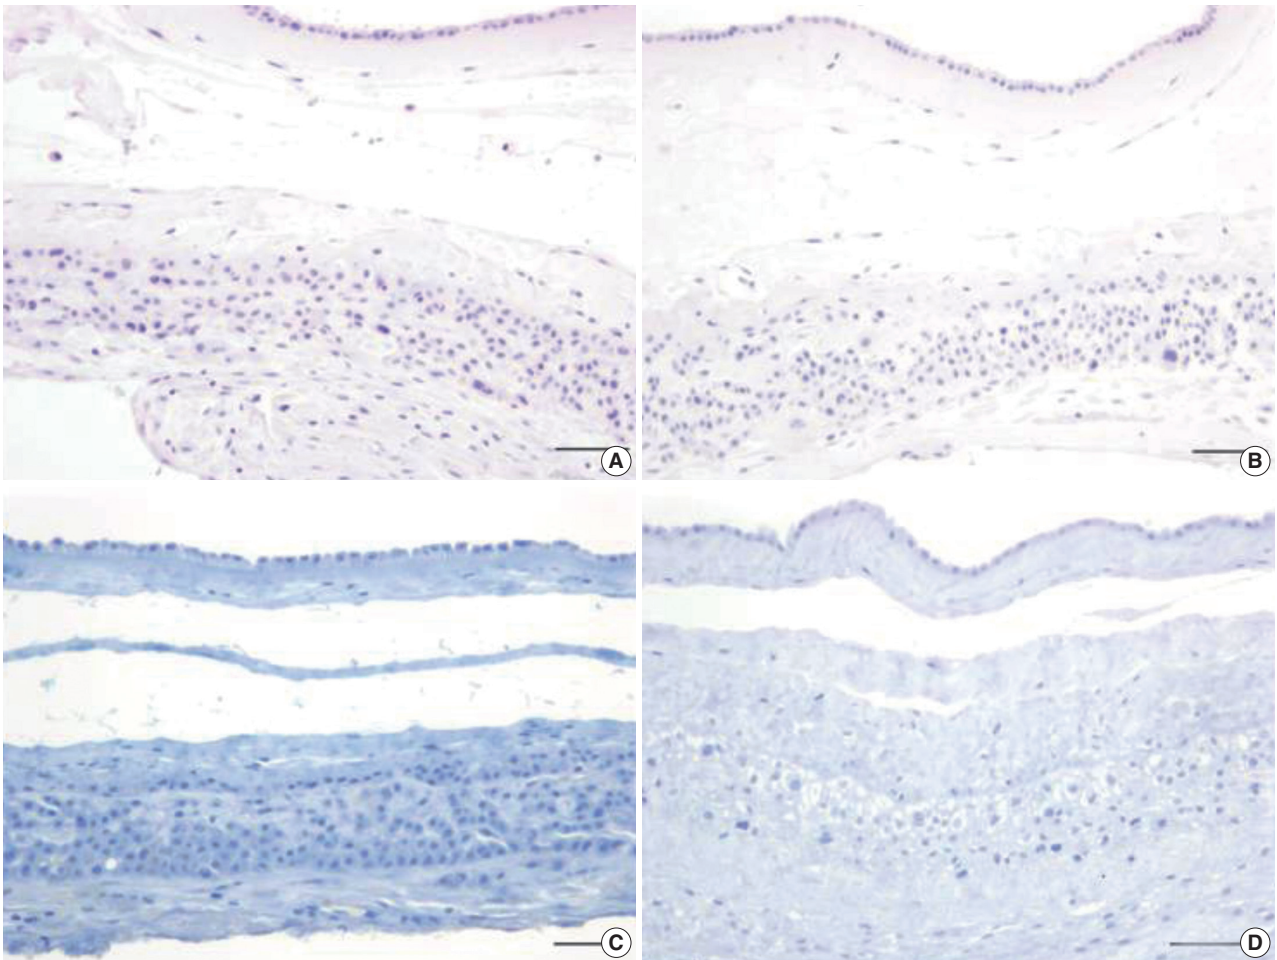

**Supplementary Fig. S1.** Negative controls for immunohistochemistry. Representative images show isotype control immunostainings in human chorioamniotic membranes. (A) Rabbit IgG isotype control antibody was used as negative control for CCL2 immunostaining. (B) Mouse IgG isotype control antibody was used as negative control for interleukin 8, galectin-1 and galectin-3 immunostainings. (C) Mouse IgG isotype control antibody was used as negative control for insulin-like growth factor-binding protein 1 immunostaining. (D) Rabbit IgG isotype control antibody was used as negative control for progesterone-associated endometrial protein immunostaining.
